# Supplementary material for: Functional Characterization of Tomato Phytochrome A and B1B2 Mutants in Response to Heat Stress
Source: MDPI journal article supplement (doi:10.3390/ijms23031681), 2022-01-31
Supplement: s1 [file s1]

**Table S1.** The primer sequences used in the quantitative RT-PCR test to analyze the relative expression levels of stress-and heat-responsive genes, as well as flower structure-controlling genes.

| Target gene        | Sequence (5'-3') |                            | Reference |
|--------------------|------------------|----------------------------|-----------|
| <i>SIHSFA1a</i>    | Forward          | GTCGAGGTTGGGAAATTTGG       |           |
|                    | Reverse          | TGTTGTCTGAGCCTAACCAG       |           |
| <i>SIHSFA1b</i>    | Forward          | CAACAACTTCTCCAGCTTCG       |           |
|                    | Reverse          | TAAGAAATCCCTCGTTCGCA       |           |
| <i>SIHSFA2</i>     | Forward          | CCAGTGCTACAGGAAGTGAT       |           |
|                    | Reverse          | TTCATTGTCCATTGCAGCAG       |           |
| <i>SIHSFB1</i>     | Forward          | GTGGTGGACGTGGTAAATG        |           |
|                    | Reverse          | TACTCTGCTCCAACCTCAAC       |           |
| <i>SIHSFA4a</i>    | Forward          | TCCTTAACCAACGTGTCCAA       |           |
|                    | Reverse          | TGGCAACCTTCTCTTCCTTT       |           |
| <i>SIHSFA5</i>     | Forward          | CACAGTCATAGTCACCCTCC       |           |
|                    | Reverse          | TGGAGTTTTGCAGCAGATTG       |           |
| <i>SIHSP70</i>     | Forward          | TGCCCAAAGATGAGGTTGAT       |           |
|                    | Reverse          | ATTCTGCTTGATTCTTCGCG       |           |
| <i>SIHSP90</i>     | Forward          | AGCGGTATTGGCATGACTAA       |           |
|                    | Reverse          | TACGCAGAGTAGAAACCCAC       |           |
| <i>SIGRP</i>       | Forward          | CCGGAAGTGTTGTTCTCTAGA      |           |
|                    | Reverse          | CAATAAGCTCCAAAAAGCAGC      |           |
| <i>SIDRCi7</i>     | Forward          | TTGTGTTTCTGTGTTGTTTTGG     | [1]       |
|                    | Reverse          | GCACATACATATGCACTTACATACAG |           |
| <i>SITAP3</i>      | Forward          | tcagacagaggatgggagaa       |           |
|                    | Reverse          | agcttcagagaattgtccaca      |           |
| <i>SITM6</i>       | Forward          | CTCCATTCGCAAATGCCACAGC     | [2]       |
|                    | Reverse          | GAAGGCGAGGAACTTAGAAGAGCAA  |           |
| <i>SIExpressed</i> | Forward          | GCTAAGAACGCTGGACCTAATG     | [3]       |
|                    | Reverse          | TGGGTGTGCCTTTCTGAATG       |           |
| <i>SIPIF4</i>      | Forward          | TGGACCGAGACACATTTGAAC      |           |
|                    | Reverse          | GGTCGCTGTAGATTGATTGC       |           |
| <i>SIPIF7a</i>     | Forward          | GCCACCACTAGTACTACCAC       |           |
|                    | Reverse          | TCCATGTCCATCGATTGAGG       |           |
| <i>SISPCH</i>      | Forward          | GGTGGAGGTGGTAATAGTGG       |           |

|        |         |                          |     |
|--------|---------|--------------------------|-----|
|        | Reverse | GACGTTGTGGTTGTGATTGT     |     |
| SINCE1 | Forward | CAACAGCAAGGAAGAAGACG     |     |
|        | Reverse | TGCCTCCAACCTCAAACCTCA    |     |
| SIPP2C | Forward | TGCTAATGTCGGAGATTCTCGTGC | [4] |
|        | Reverse | CTACTGCTAACTGCCCATCAACCC |     |
| SIP5CS | Forward | CTTGCAAACCTCAGTTCGTGT    |     |
|        | Reverse | ATCCATCAGCAATCTCCGTT     |     |
| SIP5CR | Forward | GGTGTGGTTAAGTCTGGGAT     |     |
|        | Reverse | GACTCAAAGCAGTACGACG      |     |

## References

1. Miura, K.; Shiba, H.; Ohta, M.; Kang, S.W.; Sato, A.; Yuasa, T.; Iwaya-Inoue, M.; Kamada, H.; Ezura, H. *SlICE1* Encoding a MYC-Type Transcription Factor Controls Cold Tolerance in Tomato, *Solanum Lycopersicum*. *Plant Biotechnol.* **2012**, *29*, 253–260. <https://doi.org/10.5511/plantbiotechnology.12.0303a>.
2. Cao, X.; Liu, X.; Wang, X.; Yang, M.; van Giang, T.; Wang, J.; Liu, X.; Sun, S.; Wei, K.; Wang, X.; et al. B-Class MADS-Box TM6 Is a Candidate Gene for Tomato Male Sterile-1526. *Theor. Appl. Genet.* **2019**, *132*, 2125–2135. <https://doi.org/10.1007/s00122-019-03342-z>.
3. Choi, S.; Hoshikawa, K.; Fujita, S.; Thi, D.P.; Mizoguchi, T.; Ezura, H.; Ito, E. Evaluation of Internal Control Genes for Quantitative Realtime PCR Analyses for Studying Fruit Development of Dwarf Tomato Cultivar ‘Micro-Tom.’ *Plant Biotechnol.* **2018**, *35*, 225–235.
4. Sun, L.; Wang, Y.-P.; Chen, P.; Ren, J.; Ji, K.; Li, Q.; Li, P.; Dai, S.-J.; Leng, P. Transcriptional Regulation of SIPYL, SIPP2C, and SlSnRK2 Gene Families Encoding ABA Signal Core Components during Tomato Fruit Development and Drought Stress. *J. Exp. Bot.* **2011**, *62*, 5659–5669. <https://doi.org/10.1093/jxb/err252>.
